# Supplementary material for: Effectiveness of nirmatrelvir/ritonavir in children and adolescents aged 12–17 years following SARS-CoV-2 Omicron infection: A target trial emulation
Source: PubMed Central journal article supplement (PMC11162460; doi:10.1038/s41467-024-49235-8), 2024-06-08
Supplement: 41467_2024_49235_MOESM1_ESM.pdf [file 41467_2024_49235_MOESM1_ESM.pdf]

## **Supplementary Material**

Supplementary Figure 1. Boxplot of logarithm of the inverse probability of censoring weights during treatment initiation period (day 1-5) in nirmatrelvir/ritonavir and control groups

Supplementary Table 1. Summary of the study protocol of emulating a target trial using observational data

Supplementary Table 2. Definitions of secondary study outcomes

Supplementary Table 3. Demographics and clinical characteristics of nirmatrelvir/ritonavir group and control group at the end of the 5-day grace period before the inverse probability of censoring weighting (IPCW)

Supplementary Table 4. Cause of hospitalization among nirmatrelvir/ritonavir users and controls after cloning and censoring

Supplementary Table 5. Sensitivity analyses on the 28-day all-cause hospitalization outcome by (1) truncating the IPCW at the 1st and 99th percentiles to minimize the impact of extreme weights on the results and (2) extending the follow-up duration till the end of observational period

Supplementary Table 6. Cumulative incidences of secondary study outcomes at 28 days in nirmatrelvir/ritonavir and control groups

Supplementary References

Supplementary Figure 1. Boxplot of logarithm of the inverse probability of censoring weights during treatment initiation period (day 1-5) in nirmatrelvir/ritonavir and control groups

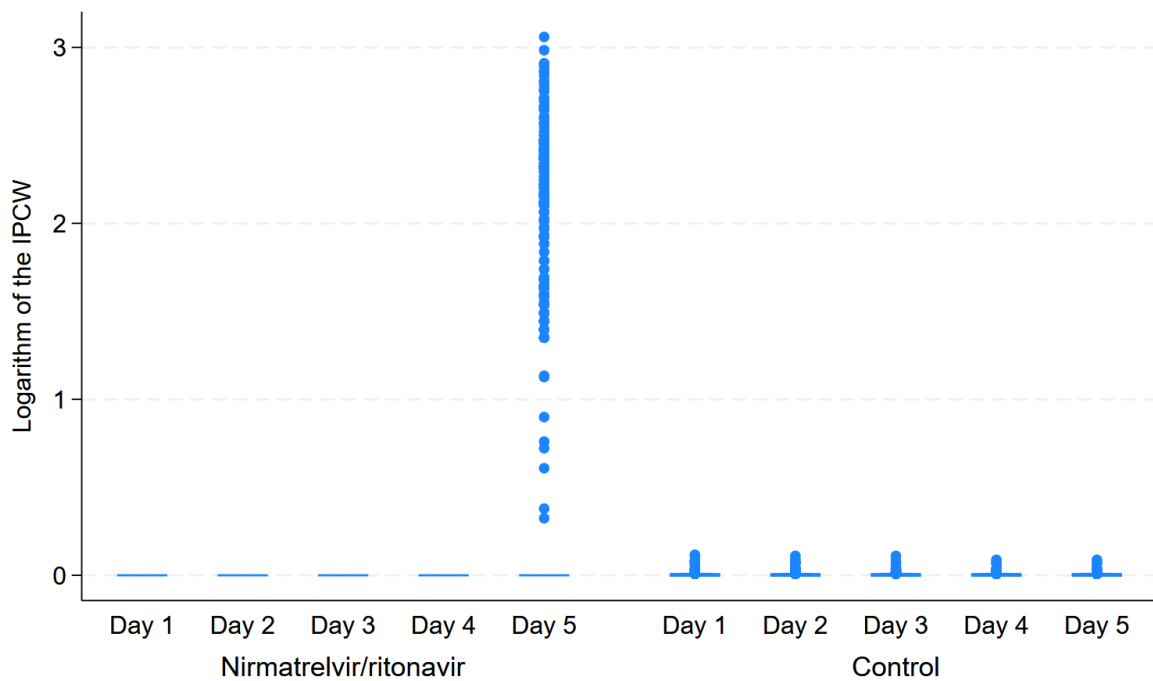

| Time point                     | Construction of IPCW <sup>1,2</sup> |                       |
|--------------------------------|-------------------------------------|-----------------------|
|                                | Nirmatrelvir/ritonavir              | Control               |
| Days 1-4 (during grace period) | 1                                   | $1/(1-p_{treatment})$ |
| Day 5 (end of grace period)    | $1/p_{treatment}$                   | $1/(1-p_{treatment})$ |
| Days >5 (after grace period)   | 1                                   | $1/(1-p_{treatment})$ |

Notes:

Boxes show median as center line; box limits indicate 25th and 75th percentiles; whiskers extend from 25th percentile less 1.5 times inter-quartile range to 75th percentile plus 1.5 times inter-quartile range; points beyond whiskers represent outliers.

$p_{treatment}$ : The probability of initiating nirmatrelvir/ritonavir treatment at each time point conditional on baseline covariates.

The weights during days 1-4 and days >5 were set to 1 in the nirmatrelvir/ritonavir group because no patients were artificially censored due to change in treatment strategy during these two periods. As there was no more informative censoring after the 5-day grace period, the probability of being censored was 0 and the daily weight was 1 for days >5 in both groups. The estimated IPCW, which was the cumulative product of daily weights since day 1, stayed constant from days >5 onwards.

Supplementary Table 1. Summary of the study protocol of emulating a target trial using observational data

| Protocol component    | Target trial specification                                                                                                                                                                                                                                                                                                                                                                                                                                                                                                                                                                                                                                                   | Emulation using observational data                                                                                                                                                                                                                                                                                                                           |
|-----------------------|------------------------------------------------------------------------------------------------------------------------------------------------------------------------------------------------------------------------------------------------------------------------------------------------------------------------------------------------------------------------------------------------------------------------------------------------------------------------------------------------------------------------------------------------------------------------------------------------------------------------------------------------------------------------------|--------------------------------------------------------------------------------------------------------------------------------------------------------------------------------------------------------------------------------------------------------------------------------------------------------------------------------------------------------------|
| Eligibility criteria  | <p>Aged 12-17 years, with confirmed SARS-CoV-2 infection diagnosis during the study inclusion period</p> <p>Patients are excluded if:</p> <ul style="list-style-type: none"> <li>• Hospitalized or dead on or before the SARS-CoV-2 infection diagnosis</li> <li>• With severe renal impairment (estimated glomerular filtration rate [eGFR] &lt;30 mL/min/1.73m<sup>2</sup>, dialysis, or renal transplantation)</li> <li>• With severe liver impairment (cirrhosis, hepatocellular carcinoma, or liver transplantation)</li> <li>• With drug contraindications to nirmatrelvir/ritonavir</li> </ul> <p>Index date is defined as that of SARS-CoV-2 infection diagnosis</p> | <p>Same as specification</p> <p>Date of confirmed SARS-CoV-2 infection diagnosis is the date of first positive reverse transcription polymerase chain reaction or rapid antigen test result during the study inclusion period.</p>                                                                                                                           |
| Treatment strategy    | Initiation of nirmatrelvir/ritonavir within five days of symptom onset                                                                                                                                                                                                                                                                                                                                                                                                                                                                                                                                                                                                       | Initiation of nirmatrelvir/ritonavir within five days of the index date                                                                                                                                                                                                                                                                                      |
| Assignment procedures | Patients are randomly assigned to receive nirmatrelvir/ritonavir in addition to usual care versus usual care alone.                                                                                                                                                                                                                                                                                                                                                                                                                                                                                                                                                          | <p>Patients will be classified into treatment or control groups based on their drug dispensing and prescription records during the first five days (grace period) from the index date.</p> <p>Random assignment of the oral antiviral treatment is assumed by the adoption of inverse probability of censoring weighting (IPCW) from the cloning method.</p> |
| Outcomes              | Primary outcome: 28-day all-cause mortality or all-cause hospitalization                                                                                                                                                                                                                                                                                                                                                                                                                                                                                                                                                                                                     | Same as specification                                                                                                                                                                                                                                                                                                                                        |

|                              |                                                                                                                                                                                                                                                                                                                                                                                                                                                                         |                                                                  |
|------------------------------|-------------------------------------------------------------------------------------------------------------------------------------------------------------------------------------------------------------------------------------------------------------------------------------------------------------------------------------------------------------------------------------------------------------------------------------------------------------------------|------------------------------------------------------------------|
|                              | <p>Secondary outcomes:</p> <ul style="list-style-type: none"> <li>• 28-day COVID-19-specific hospitalization</li> <li>• 28-day in-hospital disease progression (a composite outcome of in-hospital death, invasive mechanical ventilation, or admission to intensive care unit)</li> <li>• Multisystem inflammatory syndrome in children (MIS-C)</li> <li>• Acute liver injury</li> <li>• Acute renal failure</li> <li>• Acute respiratory distress syndrome</li> </ul> |                                                                  |
| Follow-up period             | Patients are observed from the index date (time zero) to the earliest of event occurrence, date of registered death, 28 days after the index date, or the administrative end of the follow-up period (12th February 2023).                                                                                                                                                                                                                                              | Same as specification                                            |
| Causal contrasts of interest | <p>Intention-to-treat effect</p> <p>Per-protocol effect</p>                                                                                                                                                                                                                                                                                                                                                                                                             | Observational analogue of the per-protocol effect                |
| Analysis plan                | <p>Intention-to-treat analysis</p> <p>Per-protocol analysis: patients will be censored when they deviate from the respective treatment strategies (treatment or control)</p>                                                                                                                                                                                                                                                                                            | Same as per-protocol analysis, adjusted for baseline confounders |

Supplementary Table 2. Definitions of secondary study outcomes

| Secondary outcomes                                    | ICD-9-CM            | Laboratory and other criteria                                                                                                                                                                                                                                                                                                                                                                                                                                                                                                                                   |
|-------------------------------------------------------|---------------------|-----------------------------------------------------------------------------------------------------------------------------------------------------------------------------------------------------------------------------------------------------------------------------------------------------------------------------------------------------------------------------------------------------------------------------------------------------------------------------------------------------------------------------------------------------------------|
| Multisystem inflammatory syndrome in children (MIS-C) | 446.1               | According to US Centers for Disease Control and Prevention case definition for multisystem inflammatory syndrome in children <sup>3</sup>                                                                                                                                                                                                                                                                                                                                                                                                                       |
| Acute liver injury                                    | 570                 | Satisfying at least one of the following conditions: (i) increase in alanine transaminase (ALT) was over two times the upper limit of normal (ULN); (ii) increase in aspartate transferase (AST) was over two times the ULN; (iii) increase in total bilirubin was over two times the ULN; or (iv) the international normalised ratio (INR) was over 1.5. The ULN of ALT, AST and total bilirubin were defined as 40 U-L, 40 U-L, and 19 µmol-L, respectively. (According to the Asia Pacific Association of Study of Liver consensus guidelines <sup>4</sup> ) |
| Acute renal failure                                   | 584.x               | Satisfying at least one of the following conditions: (i) increase in serum creatinine (SCr) by 0.3 mg/dL within 48 hours; (ii) increase in SCr to 1.5 times of baseline, which was known or presumed to have occurred within the week prior (According to KDIGO Clinical Practice Guideline for Acute Kidney Injury <sup>5</sup> )                                                                                                                                                                                                                              |
| Acute respiratory distress syndrome                   | 518.5 518.81 518.82 | PaO <sub>2</sub> -FiO <sub>2</sub> ratio < 40 kPa                                                                                                                                                                                                                                                                                                                                                                                                                                                                                                               |

Supplementary Table 3. Demographics and clinical characteristics of nirmatrelvir/ritonavir group and control group at the end of the 5-day grace period before the inverse probability of censoring weighting (IPCW)

| Characteristics                  | Nirmatrelvir/ritonavir users<br>(N=345) |        | Controls<br>(N=48,823) |        | SMD  |
|----------------------------------|-----------------------------------------|--------|------------------------|--------|------|
|                                  | N / Mean                                | % / SD | N / Mean               | % / SD |      |
| Age, years                       | 14.9                                    | 1.6    | 14.4                   | 1.7    | 0.26 |
| 12-13                            | 83                                      | 24.1%  | 17,068                 | 35.0%  |      |
| 14-15                            | 123                                     | 35.7%  | 16,142                 | 33.1%  | 0.25 |
| 16-17                            | 139                                     | 40.3%  | 15,613                 | 32.0%  |      |
| Sex                              |                                         |        |                        |        |      |
| Male                             | 207                                     | 60.0%  | 25,724                 | 52.7%  | 0.15 |
| Female                           | 138                                     | 40.0%  | 23,099                 | 47.3%  |      |
| SARS-CoV-2 infection period      |                                         |        |                        |        |      |
| March 2022 - May 2022            | 22                                      | 6.4%   | 8,546                  | 17.5%  | 0.74 |
| June 2022 - September 2022       | 103                                     | 29.9%  | 25,736                 | 52.7%  |      |
| October 2022 - January 2023      | 220                                     | 63.8%  | 14,541                 | 29.8%  |      |
| Symptomatic presentation         | 122                                     | 35.4%  | 26,787                 | 54.9%  | 0.40 |
| Pre-existing conditions          |                                         |        |                        |        |      |
| Asthma                           | 0                                       | 0.0%   | 3                      | 0.0%   | NA   |
| Cancer                           | 0                                       | 0.0%   | 1                      | 0.0%   | NA   |
| Cardiac disease                  | 0                                       | 0.0%   | 1                      | 0.0%   | NA   |
| Lung disease                     | 6                                       | 1.7%   | 42                     | 0.1%   | 0.17 |
| Mental disease                   | 0                                       | 0.0%   | 3                      | 0.0%   | NA   |
| Neurologic disease               | 0                                       | 0.0%   | 5                      | 0.0%   | NA   |
| Obesity                          | 1                                       | 0.3%   | 0                      | 0.0%   | NA   |
| Diabetes mellitus                | 0                                       | 0.0%   | 3                      | 0.0%   | NA   |
| Disabilities                     | 0                                       | 0.0%   | 3                      | 0.0%   | NA   |
| ADHD                             | 0                                       | 0.0%   | 1                      | 0.0%   | NA   |
| Autism                           | 0                                       | 0.0%   | 0                      | 0.0%   | NA   |
| Immunocompromised                | 2                                       | 0.6%   | 20                     | 0.0%   | 0.10 |
| Healthcare utilization           | 7                                       | 2.0%   | 2,645                  | 5.4%   | 0.18 |
| COVID-19 vaccination status*     |                                         |        |                        |        |      |
| Not fully vaccinated             | 30                                      | 8.7%   | 12,418                 | 25.4%  | 0.65 |
| Fully vaccinated but not boosted | 76                                      | 22.0%  | 16,985                 | 34.8%  |      |
| Boosted                          | 239                                     | 69.3%  | 19,420                 | 39.8%  |      |

Notes: *ADHD* attention deficit hyperactivity disorder, *SD* standard deviation, *SMD* standardized mean difference, *NA* not applicable

\* Fully vaccinated but not boosted patients were defined as those with two doses of BNT162b2 (Comirnaty) or COVID-19 Vaccine (Vero Cell), Inactivated (CoronaVac); boosted patients were defined as those with at least three doses of BNT162b2 (Comirnaty) or COVID-19 Vaccine (Vero Cell), Inactivated (CoronaVac).

Supplementary Table 4. Cause of hospitalization among nirmatrelvir/ritonavir users and controls after cloning and censoring

| Cause of hospitalization                                                                           | Nirmatrelvir/ritonavir<br>(N=211) |       | Controls<br>(N=332) |       |
|----------------------------------------------------------------------------------------------------|-----------------------------------|-------|---------------------|-------|
| COVID-19                                                                                           | 200                               | 94.8% | 215                 | 64.8% |
| Infectious and Parasitic Diseases                                                                  | 1                                 | 0.5%  | 5                   | 1.5%  |
| Neoplasms                                                                                          | 1                                 | 0.5%  | 5                   | 1.5%  |
| Endocrine, Nutritional and Metabolic Diseases, and Immunity Disorders                              | 0                                 | 0.0%  | 3                   | 0.9%  |
| Diseases of the Blood and Blood-forming Organs                                                     | 1                                 | 0.5%  | 1                   | 0.3%  |
| Mental Disorders                                                                                   | 1                                 | 0.5%  | 16                  | 4.8%  |
| Diseases of the Nervous System and Sense Organs                                                    | 0                                 | 0.0%  | 8                   | 2.4%  |
| Diseases of the Circulatory System                                                                 | 0                                 | 0.0%  | 1                   | 0.3%  |
| Diseases of the Respiratory System                                                                 | 0                                 | 0.0%  | 4                   | 1.2%  |
| Diseases of the Digestive System                                                                   | 1                                 | 0.5%  | 4                   | 1.2%  |
| Diseases of the Genitourinary System                                                               | 0                                 | 0.0%  | 2                   | 0.6%  |
| Complications of Pregnancy, Childbirth, and the Puerperium                                         | 0                                 | 0.0%  | 0                   | 0.0%  |
| Diseases of the Skin and Subcutaneous Tissue                                                       | 0                                 | 0.0%  | 3                   | 0.9%  |
| Diseases of the Musculoskeletal System and Connective Tissue                                       | 1                                 | 0.5%  | 5                   | 1.5%  |
| Congenital Anomalies                                                                               | 0                                 | 0.0%  | 1                   | 0.3%  |
| Certain Conditions originating in the Perinatal Period                                             | 0                                 | 0.0%  | 0                   | 0.0%  |
| Symptoms, Signs and Ill-defined Conditions                                                         | 2                                 | 0.9%  | 22                  | 6.6%  |
| Injury and Poisoning                                                                               | 1                                 | 0.5%  | 31                  | 9.3%  |
| Supplementary Classification of Factors influencing Health Status and Contact with Health Services | 2                                 | 0.9%  | 6                   | 1.8%  |

Notes: Among 211 hospitalized nirmatrelvir/ritonavir users after cloning, 204 and 7 were admitted during and after the grace period, respectively. Among 332 hospitalized controls after cloning, 207 and 125 were admitted during and after the grace period, respectively.

Supplementary Table 5. Sensitivity analyses on the 28-day all-cause hospitalization outcome by (1) truncating the IPCW at the 1st and 99th percentiles to minimize the impact of extreme weights on the results; and (2) extending the follow-up duration till the end of observational period

|                                                                                         | Cumulative incidence              |                    | Absolute risk reduction <sup>a</sup> | 95% CI <sup>b</sup> | Relative risk <sup>a</sup> | 95% CI <sup>b</sup> |
|-----------------------------------------------------------------------------------------|-----------------------------------|--------------------|--------------------------------------|---------------------|----------------------------|---------------------|
|                                                                                         | Nirmatrelvir/Ritonavir (N=49,378) | Control (N=49,378) |                                      |                     |                            |                     |
| Truncating the inverse probability of censoring weights at the 1st and 99th percentiles | 0.45%                             | 0.68%              | 0.22%                                | (0.17%, 0.29%)      | 0.67                       | (0.58, 0.74)        |
| Extending the follow-up duration till the end of observational period                   | 0.45%                             | 0.69%              | 0.24%                                | (0.20%, 0.32%)      | 0.65                       | (0.55, 0.70)        |

Notes: *CI* confidence interval

<sup>a</sup> Absolute risk reduction >0 (or <0) and relative risk <1 (or >1) indicate nirmatrelvir/ritonavir users had lower (higher) risk of the designated outcome compared to controls.

<sup>b</sup> The 95% CIs were calculated using 500 bootstrap replicates.



Supplementary Table 6. Cumulative incidences of secondary study outcomes at 28 days in nirmatrelvir/ritonavir and control groups

|                                                       | Cumulative incidence   |         | Absolute risk reduction <sup>a</sup> | 95% CI <sup>b</sup> | Relative risk <sup>a</sup> | 95% CI <sup>b</sup> |
|-------------------------------------------------------|------------------------|---------|--------------------------------------|---------------------|----------------------------|---------------------|
|                                                       | Nirmatrelvir/ritonavir | Control |                                      |                     |                            |                     |
| All-cause mortality                                   | 0.00%                  | 0.00%   | NA                                   | NA                  | NA                         | NA                  |
| COVID-19-specific hospitalization                     | 0.40%                  | 0.44%   | 0.04%                                | (0.02%, 0.06%)      | 0.91                       | (0.85, 0.94)        |
| In-hospital disease progression                       | 0.00%                  | 0.02%   | 0.01%                                | (0.00%, 0.03%)      | 0.22                       | (0.00, 0.54)        |
| In-hospital death                                     | 0.00%                  | 0.00%   | NA                                   | NA                  | NA                         | NA                  |
| Invasive mechanical ventilation                       | 0.00%                  | 0.00%   | NA                                   | NA                  | NA                         | NA                  |
| Intensive care unit admission                         | 0.00%                  | 0.01%   | 0.01%                                | (0.00%, 0.02%)      | 0.29                       | (0.00, 0.67)        |
| Multisystem inflammatory syndrome in children (MIS-C) | 0.00%                  | 0.00%   | NA                                   | NA                  | NA                         | NA                  |
| Acute liver injury                                    | 0.00%                  | 0.01%   | 0.01%                                | (0.00%, 0.02%)      | 0.33                       | (0.00, 0.75)        |
| Acute renal failure                                   | 0.01%                  | 0.02%   | 0.02%                                | (0.01%, 0.03%)      | 0.25                       | (0.00, 0.54)        |
| Acute respiratory distress syndrome                   | 0.01%                  | 0.02%   | 0.00%                                | (0.00%, 0.01%)      | 0.74                       | (0.34, 1.00)        |

Notes: *CI* confidence interval, *NA* not applicable

<sup>a</sup> Absolute risk reduction >0 (or <0) and relative risk <1 (or >1) indicate nirmatrelvir/ritonavir users had lower (higher) risk of the designated outcome compared to controls.

<sup>b</sup> The 95% CIs were calculated using 500 bootstrap replicates.

## Supplementary References

- 1 Hernan, M. A., Brumback, B. & Robins, J. M. Marginal structural models to estimate the causal effect of zidovudine on the survival of HIV-positive men. *Epidemiology* **11**, 561-570 (2000). <https://doi.org/10.1097/00001648-200009000-00012>
- 2 Emilsson, L. *et al.* Examining Bias in Studies of Statin Treatment and Survival in Patients With Cancer. *JAMA Oncol* **4**, 63-70 (2018). <https://doi.org/10.1001/jamaoncol.2017.2752>
- 3 Yousaf, A. R. *et al.* Reported cases of multisystem inflammatory syndrome in children aged 12-20 years in the USA who received a COVID-19 vaccine, December, 2020, through August, 2021: a surveillance investigation. *Lancet Child Adolesc Health* **6**, 303-312 (2022). [https://doi.org/10.1016/S2352-4642\(22\)00028-1](https://doi.org/10.1016/S2352-4642(22)00028-1)
- 4 Devarbhavi, H. *et al.* Drug-induced liver injury: Asia Pacific Association of Study of Liver consensus guidelines. *Hepatol Int* **15**, 258-282 (2021). <https://doi.org/10.1007/s12072-021-10144-3>
- 5 Khwaja, A. KDIGO clinical practice guidelines for acute kidney injury. *Nephron Clin Pract* **120**, c179-184 (2012). <https://doi.org/10.1159/000339789>
